# Supplementary material for: SP1/CTR1 mediated oxidative stress-induced cuproptosis in intervertebral disk degeneration
Source: Research Square preprint supplement (doi:10.21203/rs.3.rs-2585336/v1), 2023-03-14
Supplement: Supplementary file 1 [file 5af1a294aaa46f11796196ad.docx]

| **Supplementary Table 1 The sequences of siRNAs** | | |
| --- | --- | --- |
| **Name** | **Sense (5'-3')** | **Antisense (5'-3')** |
| siFDX1-1 | CGGAGUAGCUCAGAAGAUATT | UAUCUUCUGAGCUACUCCGTT |
| siFDX1-2 | GCUGGGCUGUCAAGUUUGUTT | ACAAACUUGACAGCCCAGCTT |
| siCtr1-1 | GGAUGAACCACAUGGAGAUTT | AUCUCCAUGUGGUUCAUCCTT |
| siCtr1-2 | GCAUUCGCUACAAUUCCAUTT | AUGGAAUUGUAGCGAAUGCTT |

| **Supplementary Table 2 The sequences of primers** | | |
| --- | --- | --- |
| **Target** | **Sequence (5'-3')** | |
| Sp1 | Forward primer | CCACCATGAGCGACCAAGAT |
| Reverse primer | AAGGCACCACCACCATTACCA |
| GAPDH | Forward primer | AATCCCATCACCATCTTCCAG |
| Reverse primer | GAGCCCCAGCCTTCTCCAT |

**Supplementary Table 3 Chip-qPCR primers**

| **SP1 binding site in the promoter of Ctr1 gene** | | |
| --- | --- | --- |
| **Primers** | Forward primer | ACCGAAAGTAGACTGGGCTCT |
| Reverse primer | GTCCCTAACCAGCCATTACGA |
| **Target DNA fragment** | >hg38_dna range=chr9:113221257-113221606 5'pad=0 3'pad=0 strand=+ repeatMasking=none  ACCGGGTTGCGGGGAGGAAGCTGGGTATTCCCAGAGTCCCAGGGCCTGTCACCGCCGACGTCGTAAAATGCCGCGGCGGCGTGCTGCTTTCCGGCAGGGCGAACTCCAGCACGGTCTCTGGACCGAAAGTAGACTGGGCTCTGGAGAAGGTGGGGCAAAGGCAAATGAGAGGCTCGCGCGGGCACGAGCGCCGAGTGACGTCAGGCCTCTCCAGCCCGCAGCGGGGCGGAGCTTCACAGCCCCTTGCAGGGATTGGTCGGTAATGCTAGGGGGCGGGAGGGGGCGGGAAATCCTCGGCCTCGGTGGCGGTGGTGGACACGTCGAGCCGGGTAGAAGTGGAGGGGCCGTTC | |

**Supplementary Table 4 Information of Cases**

| **No.** | **Age** | **Gender** | **Dignosis** | **Grade** | **Surgery** | **Classification** |
| --- | --- | --- | --- | --- | --- | --- |
| 1 | 23 | Male | Lumbar disc herniation | I-II | Percutaneous endoscopic transforaminal discectomy | Control |
| 2 | 21 | Male | Spine burst fractures | I-II | Open spine surgery | Control |
| 3 | 34 | Male | Lumbar disc herniation | I-II | Percutaneous endoscopic transforaminal discectomy | Control |
| 4 | 20 | Male | Lumbar disc herniation | I-II | Percutaneous endoscopic transforaminal discectomy | Control |
| 5 | 56 | Female | Lumbar disc herniation | III | Percutaneous endoscopic transforaminal discectomy | Degeneration |
| 6 | 43 | Male | Lumbar disc herniation | III | Percutaneous endoscopic transforaminal discectomy | Degeneration |
| 7 | 48 | Male | Lumbar disc herniation | III | Percutaneous endoscopic transforaminal discectomy | Degeneration |
| 8 | 64 | Female | Lumbar disc prolapses | IV | Percutaneous endoscopic transforaminal discectomy | Degeneration |
| 9 | 37 | Female | Lumbar disc herniation | IV | Percutaneous endoscopic transforaminal discectomy | Degeneration |
| 10 | 63 | Female | Lumbar disc herniation | V | Percutaneous endoscopic transforaminal discectomy | Degeneration |


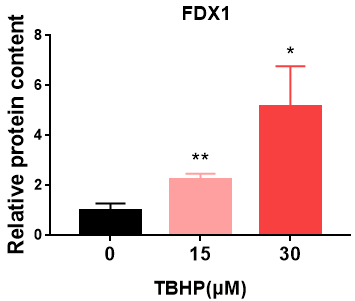


**Figure S1. The protein content of FDX1 in NPCs treated with TBHP.** Data are presented as the mean ± SD, n = 3, ns, no significance, *p < 0.05, **p < 0.01 compared with TBHP 0 group.


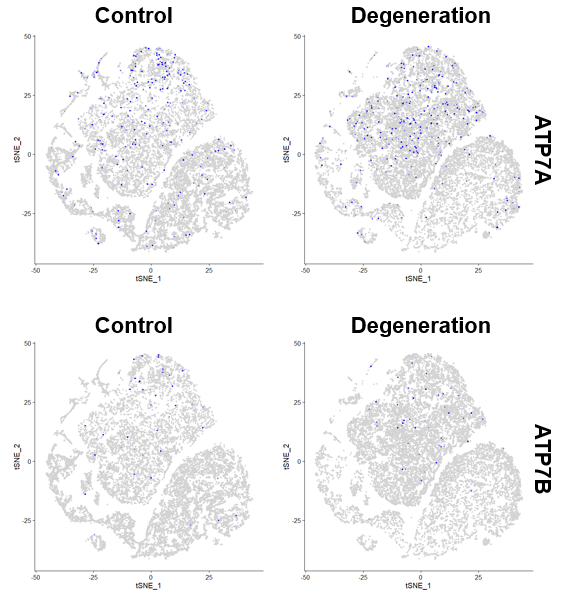


**Figure S2.** ATP7A and ATP7B expression in different cell clusters between control and degeneration NP tissue on t-SNE plot.


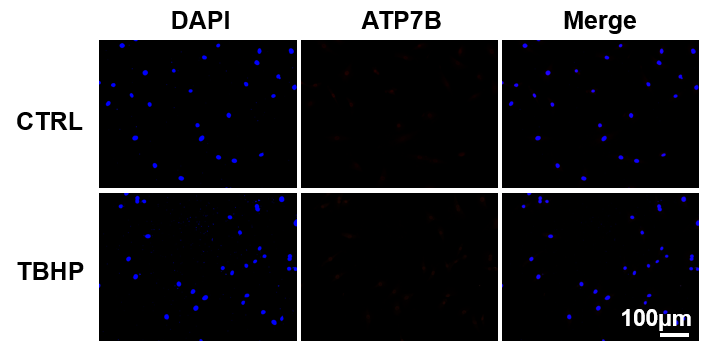


**Figure S3**. Representative fluorescence images showing the expression of ATP7B in NPCs treated with TBHP.
